# Supplementary material for: Disturbance tolerance of arbuscular mycorrhizal fungi: characterization of life-history strategies along a disturbance gradient in a coastal dune ecosystem
Source: Springer Nature journal article supplement (doi:10.1007/s11104-023-06337-4), 2023-10-24
Supplement: MOESM1 [file 11104_2023_6337_MOESM1_ESM.docx]

Supplemental material

Disturbance tolerance of arbuscular mycorrhizal fungi: characterization of life-history strategies along a disturbance gradient in a coastal dune ecosystem

Anjar Cahyaningtyas and Tatsuhiro Ezawa

Graduate School of Agriculture, Hokkaido University, Sapporo, Hokkaido 060–8589, Japan

Fig. S1. Rarefaction analysis on AM fungal OTU richness in the trap cultures.

Fig. S2 Venn diagram of AM fungal OTUs occurred in this study (light yellow) and Kawahara and Ezawa (2013).

Table S1. GPS data for the sampling plots.

**Fig. S1** Rarefaction analysis on AM fungal OTU richness in the trap cultures using the samples from five plots (two technical replication per plot) designated in each of the landward (red line) and seaward (blue line) slopes (*n* = 10) in Ishikari sand dunesbased on the numbers of sample, in which 95% confident intervals are indicated with light colors.

**Fig. S2** Venn diagram of AM fungal OTUs occurred in this study (light yellow) and Kawahara and Ezawa (2013) in which the root samples from the field (green) and trap culture experiment (magenta) were analyzed. The numbers of OTU are indicated. The five OTUs that were detected uniquely in the field roots collected from the landward (*M. sinensis*) and seaward (*L. mollis*) slopes are highlighted with a bold black line as potential slow regenerators missed in this study. The common OTUs that occurred in the previous trap culture and this study were also highlighted with a bold black line, in which five potential rapid regenerator OTUs that were assigned to slow regenerators in this study but occurred in the previous trap cultures are included.

| **Table S1.** GPS data of the sampling plots. | | | |
| --- | --- | --- | --- |
| Plot ID | Soil sample ID | Latitude | Longitude |
| Landward slope | |  |  |
| 1L | 1L1 - 1L4 | 43o14'33"N | 141o20'40"E |
| 2L | 2L1 - 2L4 | 43o14'27"N | 141o20'34"E |
| 3L | 3L1 - 3L4 | 43o14'22"N | 141o20'28"E |
| 4L | 4L1 - 4L4 | 43o14'18"N | 141o20'23"E |
| 5L | 5L1 - 5L4 | 43o14'13"N | 141o20'17"E |
|  |  |  |  |
| Seaward slope | |  |  |
| 1S | 1S1 - 1S4 | 43o14'34"N | 141o20'37"E |
| 2S | 2S1 - 2S4 | 43o14'29"N | 141o20'31"E |
| 3S | 3S1 - 3S4 | 43o14'24"N | 141o20'26"E |
| 4S | 4S1 - 4S4 | 43o14'20"N | 141o20'21"E |
| 5S | 5S1 - 5S4 | 43o14'14"N | 141o20'15"E |
